# Supplementary material for: Shrinking microbubbles with microfluidics: mathematical modelling to control microbubble sizes
Source: Royal Society of Chemistry journal article supplement (doi:10.1039/c7sm01418j), 2017-01-01
Supplement: c7sm01418j1.pdf [file c7sm01418j1.pdf]

## Supporting Information

# Shrinking microbubbles with microfluidics: mathematical modelling to control microbubble sizes

A. Salari,<sup>ade</sup> V. Gnyawali,<sup>cde</sup> I.M. Griffiths,<sup>f</sup> R. Karshafian,<sup>bde</sup> M.C. Kolios,<sup>bde</sup> and S.S.H. Tsai<sup>cde†</sup>

<sup>a</sup> Biomedical Engineering Graduate Program, Ryerson University, Toronto, Canada.

<sup>b</sup> Department of Physics, Ryerson University, Toronto, Canada.

<sup>c</sup> Department of Mechanical and Industrial Engineering, Ryerson University, Toronto, Canada.

<sup>d</sup> Institute for Biomedical Engineering, Science and Technology (iBEST), Toronto, Canada.

<sup>e</sup> Keenan Research Centre, St. Michael's Hospital, Toronto, Canada.

<sup>f</sup> Mathematical Institute, University of Oxford, Oxford, United Kingdom.

† E-mail: scott.tsai@ryerson.ca

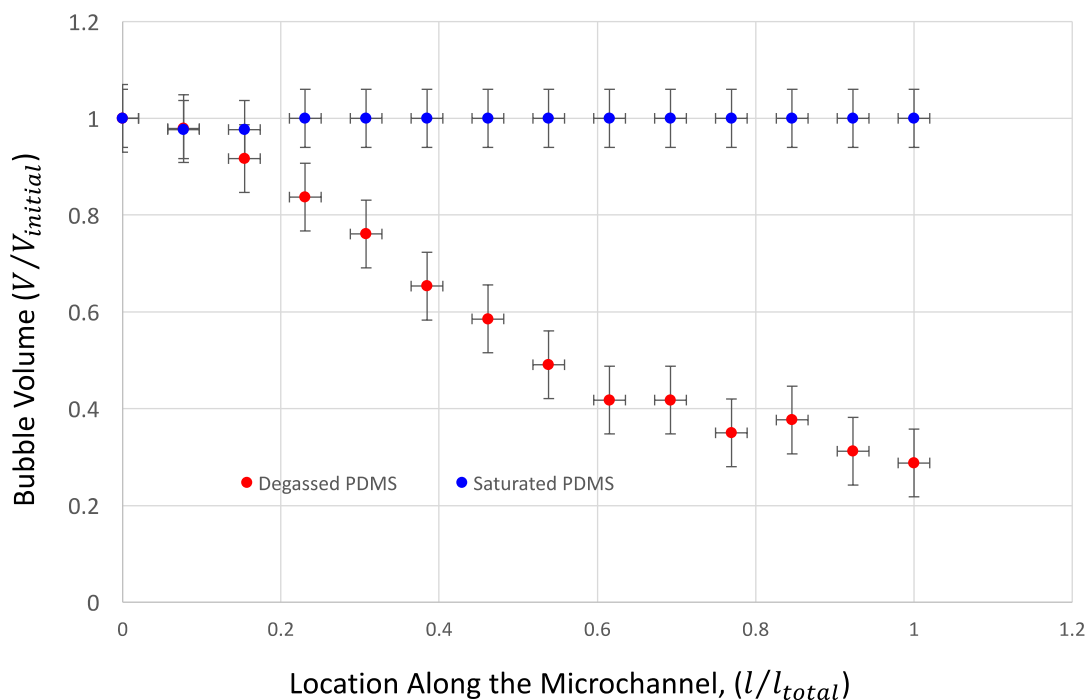

Fig. S1. Comparison of bubble shrinkage results along the microfluidic channel for a degassed PDMS device, and a saturated PDMS device left in atmospheric condition for 24 hours prior to usage. In these experiments, the aqueous liquid flow rate and air pressure are  $3 \mu\text{Lmin}^{-1}$  and  $25.5 \pm 1.5 \text{ kPa}$ , respectively. The vacuum pressure  $P_v = 0$ .
